# Supplementary material
Source: PubMed Central journal article supplement (PMC5487635)
Supplement: AAC.02223-16_zac007176306s1.pdf [file AAC.02223-16_zac007176306s1.pdf]

## 1 Supplementary Material

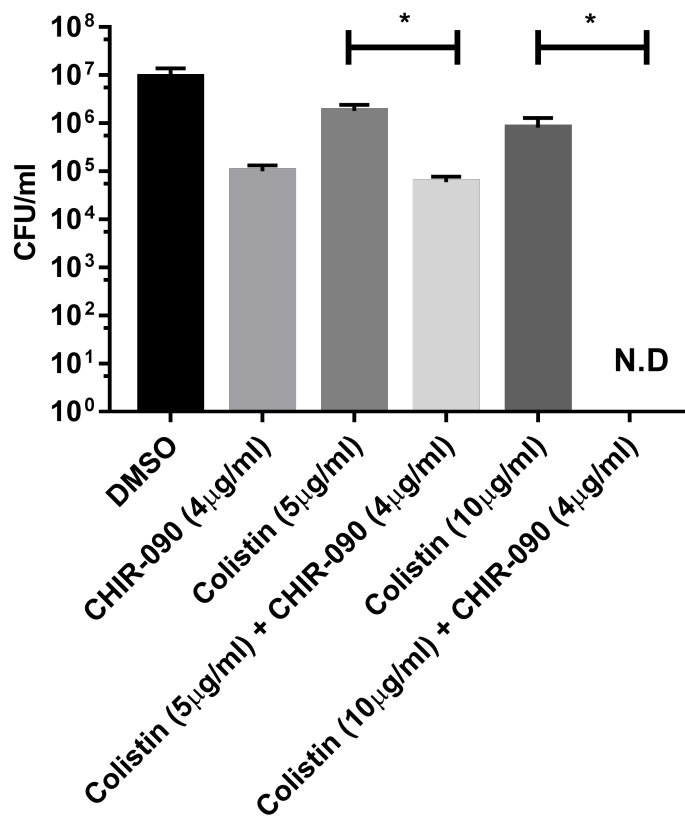

2

3 **Figure S1: Evaluation of colistin and CHIR-090 combination using beads PAO1 biofilm**

4 **assay.** Raw bacteria count for the killing effect of i) DMSO (Control), ii) CHIR-090 at

5 4 µg/ml, iii) Colistin at 5 µg/ml, iv) Colistin at 5 µg/ml combined with CHIR-090 at 4 µg/ml, v)

6 Colistin at 10 µg/ml and vi) Colistin at 10 µg/ml combined with CHIR-090 at 4 µg/ml.

7 Statistical significance were analyzed with Student's T-test (\*P<0.05). N.D – Not detectable

8
